# Supplementary material for: Unveiling the Unpredictable in Parkinson’s Disease: Sensor-Based Monitoring of Dyskinesias and Freezing of Gait in Daily Life
Source: MDPI journal article supplement (doi:10.3390/bioengineering11050440), 2024-04-29
Supplement: s1 [file s1]

STROBE Statement—checklist of items that should be included in reports of observational studies

|                          | Item No. | Recommendation                                                                                                                                                                       | Page No. |
|--------------------------|----------|--------------------------------------------------------------------------------------------------------------------------------------------------------------------------------------|----------|
| Title and abstract       | 1        | (a) Indicate the study’s design with a commonly used term in the title or the abstract                                                                                               | 1        |
|                          |          | (b) Provide in the abstract an informative and balanced summary of what was done and what was found                                                                                  | 1        |
| Introduction             |          |                                                                                                                                                                                      |          |
| Background/rationale     | 2        | Explain the scientific background and rationale for the investigation being reported                                                                                                 | 1-4      |
| Objectives               | 3        | State specific objectives, including any prespecified hypotheses                                                                                                                     | 4        |
| Methods                  |          |                                                                                                                                                                                      |          |
| Study design             | 4        | Present key elements of study design early in the paper                                                                                                                              | 4        |
| Setting                  | 5        | Describe the setting, locations, and relevant dates, including periods of recruitment, exposure, follow-up, and data collection                                                      | 4-5      |
| Participants             | 6        | (a) Cohort study—Give the eligibility criteria, and the sources and methods of selection of participants. Describe methods of follow-up                                              | 4-5      |
|                          |          | Case-control study—Give the eligibility criteria, and the sources and methods of case ascertainment and control selection. Give the rationale for the choice of cases and controls   |          |
|                          |          | Cross-sectional study—Give the eligibility criteria, and the sources and methods of selection of participants                                                                        |          |
|                          |          | (b) Cohort study—For matched studies, give matching criteria and number of exposed and unexposed                                                                                     | 10-11    |
|                          |          | Case-control study—For matched studies, give matching criteria and the number of controls per case                                                                                   |          |
| Variables                | 7        | Clearly define all outcomes, exposures, predictors, potential confounders, and effect modifiers. Give diagnostic criteria, if applicable                                             | 9-10     |
| Data sources/measurement | 8*       | For each variable of interest, give sources of data and details of methods of assessment (measurement). Describe comparability of assessment methods if there is more than one group | 9-10     |
| Bias                     | 9        | Describe any efforts to address potential sources of bias                                                                                                                            | 10-11    |
| Study size               | 10       | Explain how the study size was arrived at                                                                                                                                            | 9        |

Continued on next page

|                        |     |                                                                                                                                                                                                              |                      |
|------------------------|-----|--------------------------------------------------------------------------------------------------------------------------------------------------------------------------------------------------------------|----------------------|
| Quantitative variables | 11  | Explain how quantitative variables were handled in the analyses. If applicable, describe which groupings were chosen and why                                                                                 | 9-11                 |
| Statistical methods    | 12  | (a) Describe all statistical methods, including those used to control for confounding                                                                                                                        | 9-11                 |
|                        |     | (b) Describe any methods used to examine subgroups and interactions                                                                                                                                          | 9-11                 |
|                        |     | (c) Explain how missing data were addressed                                                                                                                                                                  | 11                   |
|                        |     | (d) <i>Cohort study</i> —If applicable, explain how loss to follow-up was addressed                                                                                                                          | 11                   |
|                        |     | <i>Case-control study</i> —If applicable, explain how matching of cases and controls was addressed                                                                                                           |                      |
|                        |     | <i>Cross-sectional study</i> —If applicable, describe analytical methods taking account of sampling strategy                                                                                                 |                      |
|                        |     | (e) Describe any sensitivity analyses                                                                                                                                                                        | NA                   |
| <b>Results</b>         |     |                                                                                                                                                                                                              |                      |
| Participants           | 13* | (a) Report numbers of individuals at each stage of study—eg numbers potentially eligible, examined for eligibility, confirmed eligible, included in the study, completing follow-up, and analysed            | 11; Table 1; Table 2 |
|                        |     | (b) Give reasons for non-participation at each stage                                                                                                                                                         | NA                   |
|                        |     | (c) Consider use of a flow diagram                                                                                                                                                                           | NA                   |
| Descriptive data       | 14* | (a) Give characteristics of study participants (eg demographic, clinical, social) and information on exposures and potential confounders                                                                     | Table 1; Table 2     |
|                        |     | (b) Indicate number of participants with missing data for each variable of interest                                                                                                                          | NA                   |
|                        |     | (c) <i>Cohort study</i> —Summarise follow-up time (eg, average and total amount)                                                                                                                             | 11                   |
| Outcome data           | 15* | <i>Cohort study</i> —Report numbers of outcome events or summary measures over time                                                                                                                          | NA                   |
|                        |     | <i>Case-control study</i> —Report numbers in each exposure category, or summary measures of exposure                                                                                                         | NA                   |
|                        |     | <i>Cross-sectional study</i> —Report numbers of outcome events or summary measures                                                                                                                           | 13-17                |
| Main results           | 16  | (a) Give unadjusted estimates and, if applicable, confounder-adjusted estimates and their precision (eg, 95% confidence interval). Make clear which confounders were adjusted for and why they were included | NA                   |
|                        |     | (b) Report category boundaries when continuous variables were categorized                                                                                                                                    | NA                   |
|                        |     | (c) If relevant, consider translating estimates of relative risk into absolute risk for a meaningful time period                                                                                             | NA                   |

Continued on next page

|                          |    |                                                                                                                                                                            |       |
|--------------------------|----|----------------------------------------------------------------------------------------------------------------------------------------------------------------------------|-------|
| Other analyses           | 17 | Report other analyses done—eg analyses of subgroups and interactions, and sensitivity analyses                                                                             | 13-17 |
| <b>Discussion</b>        |    |                                                                                                                                                                            |       |
| Key results              | 18 | Summarise key results with reference to study objectives                                                                                                                   | 17    |
| Limitations              | 19 | Discuss limitations of the study, taking into account sources of potential bias or imprecision. Discuss both direction and magnitude of any potential bias                 | 22    |
| Interpretation           | 20 | Give a cautious overall interpretation of results considering objectives, limitations, multiplicity of analyses, results from similar studies, and other relevant evidence | 18-22 |
| Generalisability         | 21 | Discuss the generalisability (external validity) of the study results                                                                                                      | 22    |
| <b>Other information</b> |    |                                                                                                                                                                            |       |
| Funding                  | 22 | Give the source of funding and the role of the funders for the present study and, if applicable, for the original study on which the present article is based              | 23    |

\*Give information separately for cases and controls in case-control studies and, if applicable, for exposed and unexposed groups in cohort and cross-sectional studies.
